# Supplementary material
Source: PubMed Central journal article supplement (PMC5065420)
Supplement: 10-1055-s-0042-113188_gf1088de.pdf [file 10-1055-s-0042-113188_gf1088de.pdf]

# Gesundheitsbezogene Lebensqualität bei Brustkrebspatientinnen in der metastasierten oder adjuvanten Situation

## Health-related Quality of Life in Metastatic and Adjuvant Breast Cancer Patients

### Autoren

M. Wallwiener<sup>1</sup>, E. Simoes<sup>2,3,4</sup>, A. N. Sokolov<sup>2,3</sup>, S. Y. Brucker<sup>2,3</sup>, P. A. Fasching<sup>5</sup>, J. Graf<sup>2,3,6</sup>

### Institute

Die Institutsangaben sind am Ende des Beitrags gelistet.

### Schlüsselwörter

- Brustkrebs
- metastasierte oder adjuvante Situation
- PRO
- gesundheitsbezogene Lebensqualität
- EORTC QLQ-C30

### Key words

- breast cancer
- metastatic and adjuvant setting
- PRO
- HRQL
- EORTC QLQ-C30

### Zusammenfassung

**Einleitung:** Liegt bei einer Krebserkrankung bereits ein fortgeschrittenes Stadium vor und ist somit eine primäre Heilung nicht mehr möglich, steht die Erhaltung der Lebensqualität im Fokus. Gerade beim Mammakarzinom sind durch die verbesserten neuen Therapien auch im metastasierten Stadium noch längere stabile Verläufe möglich. Ziel dieser Studie war es deshalb, einerseits die Lebensqualität der Patientinnen durch einen Vergleich mit Daten der Gesamtbevölkerung darzustellen und andererseits Unterschiede zwischen den verschiedenen Erhebungsinstrumenten aufzuzeigen.

**Material und Methoden:** Insgesamt wurden n=96 Brustkrebspatientinnen in metastasierter oder adjuvanter Situation hinsichtlich ihrer Lebensqualität befragt. Dabei kamen die etablierten Erhebungsinstrumente EORTC QLQ-C30, EORTC QLQ-BR23, EQ-5D-5L und EQ-VAS zum Einsatz, wobei alle Patientinnen alle Bögen ausfüllten. Die statistische Analyse erfolgte mittels MS Excel und SPSS.

**Ergebnisse:** Obwohl die Bögen zum gleichen Zeitpunkt ausgefüllt wurden, zeigten sich deutliche Unterschiede im Belastungsniveau in Abhängigkeit zum angewandten Bogen. Beim Einsatz des EQ VAS wurde der aktuelle Gesundheitsstatus signifikant besser beurteilt als beim EORTC QLQ-C30. Insgesamt gestaltete sich die Lebensqualität der Patientinnen in allen Dimensionen als optimierungsbedürftig und war in allen Bereichen signifikant schlechter als in der Referenzbevölkerung.

**Schlussfolgerung:** Um die Lebensqualität von metastasierten Patientinnen zu verbessern, ergibt sich die Notwendigkeit des beständigen Therapieerfolg-Monitorings. Von Relevanz ist die Wahl des Erhebungsinstruments, da in Abhängigkeit vom Erhebungsinstrument unterschiedliche Werte ermittelt wurden.

### Abstract

**Introduction:** When cancer patients have advanced disease and a primary cure is no longer possible, the focus is on maintaining the patient's quality of life. Recent therapeutic advances in breast cancer treatment mean that even patients with metastatic disease can remain stable for long periods of time. The aim of this study was to look at the health-related quality of life (HRQL) of these patients and compare it with data for the general population and to show the differences in outcomes for different survey instruments used to measure quality of life.

**Material and Methods:** A total of 96 breast cancer patients with metastatic disease or receiving adjuvant therapy were questioned about their quality of life. Patients were investigated using the established survey instruments EORTC QLQ-C30, EORTC QLQ-BR23, EQ-5D-5L and EQ VAS. All patients filled out questionnaires. Statistical analysis was done using MS Excel and SPSS.

**Results:** Although the questionnaires were completed at the same time, the different questionnaires showed significant differences with regard to the level of stress experienced by the patient. When the EQ VAS questionnaire was used, the patient's current state of health was assessed as significantly better than with the EORTC QLQ-C30. Overall, all aspects of patients' quality of life were found to be in need of optimization and HRQL of patients was significantly poorer in all areas compared to the reference population.

**Conclusion:** To improve the quality of life of patients with metastatic disease, it is necessary to continuously monitor the success of therapy. The choice of survey tools is highly relevant as assessments differ considerably depending on the choice of questionnaire.

**eingereicht** 17.5.2016

**revidiert** 4.7.2016

**akzeptiert** 21.7.2016

### Bibliografie

**DOI** <http://dx.doi.org/10.1055/s-0042-113188>  
Geburtsh Frauenheilk 2016; 76:  
1–9 © Georg Thieme Verlag KG  
Stuttgart · New York ·  
ISSN 0016-5751

### Korrespondenzadresse

**Joachim Graf, M.A.**  
Department für  
Frauengesundheit  
Universitätsklinikum Tübingen  
Calwerstraße 7  
72076 Tübingen  
joachim.graf@  
med.uni-tuebingen.de

## Einleitung

Das Mammakarzinom gehört zu den häufigsten malignen Erkrankungen und stellt mit 32% aller Krebsneuerkrankungen die häufigste Krebserkrankung der Frau dar. Das Lebenszeitrisko beträgt aktuell 12,9% [1]. Die jährliche Inzidenz in Deutschland wird aktuell (2016) auf 65 500 Fälle prognostiziert [2], die altersstandardisierte Inzidenz betrug in 2012 117 Fälle pro 100 000 Einwohner und Jahr [3]. Aufgrund mannigfaltiger Weiterentwicklungen in Therapie und Diagnostik konnte die Sterblichkeit in den letzten Jahren deutlich gesenkt werden [4]. Die altersstandardisierte Mortalität betrug in Deutschland in 2010 23,9 Fälle pro 100 000 Einwohner und Jahr, knapp 18 000 Patientinnen sterben jährlich an der Erkrankung [3]. Die durchschnittliche 5-Jahres-Überlebensrate (relativ) unabhängig von Tumorstatus, Stadium und Metastasierungsgrad wird auf 81% geschätzt, wobei im Frühstadium relative Überlebensraten von über 90% erreicht werden [2,4–8]. In ätiologischer Perspektive sind eine früh einsetzende Menarche, Kinderlosigkeit, höheres Lebensalter bei Erst-Gravidität, später Eintritt der Menopause, Hormonersatztherapien, östrogen- und progesteronhaltige Ovulationshemmer, Bewegungsmangel, Übergewicht und Alkoholabusus von Bedeutung [9]. 5–10% der Brustkrebserkrankungen gelten als genetisch determiniert [10]. Bei Vorliegen einer Mutation des BRCA-1-Genes beträgt das Lebenszeitrisko 57%, beim BRCA-2-Gen 49% [11]. Während Brustkrebs im Frühstadium mit hohen Überlebensraten vergesellschaftet ist und häufig kurativ therapiert werden kann, gestaltet sich die Perspektive für Patientinnen im metastasierten Stadium deutlich ungünstiger. Häufig kann hier nur palliativ behandelt werden, mit dem Ziel, die Überlebenszeit bei weitestgehender Beschwerdefreiheit von tumorbedingten Symptomen und möglichst hoher Lebensqualität zu verlängern [12–14]. Die mittlere Lebenserwartung beim Mammakarzinom in der metastasierten Situation beträgt 18–33 Monate, die mediane progressionsfreie Überlebenszeit wird mit 13,5 bis 17 Monaten angegeben [15,16]. Aktuell wird von einer relativen 5-Jahres-Überlebensrate von deutlich unter 50% ausgegangen [15], für Patientinnen mit Knochenmetastasen ist eine relative 10-Jahres-Überlebensrate von 35% angegeben [17,18].

Insbesondere bei Erkrankungen mit potenziell chronischem Verlauf ist die gesundheitsbezogene Lebensqualität als Indikator für die Wirksamkeit der therapeutischen Maßnahmen im Kontext einer zunehmend personalisiert ausgerichteten Medizin von großer Bedeutung. Der Begriff bezeichnet dabei ein multidimensionales Konstrukt aus physischen, psychischen und sozialen Aspekten. Die gesundheitsbezogene Lebensqualität gehört damit zu den subjektiv wahrgenommenen Gesundheitszuständen, die ohne Interpretation der behandelnden Ärzte erhoben werden (Patient Reported Outcomes PRO) [19,20]. Als Erhebungsinstrumente dienen dabei i. d. R. validierte Fragebögen, wobei zwischen generischen (z. B. SF-36) und spezifischen (z. B. EORTC QLQ-30) Messinstrumenten unterschieden wird. Letztere finden insbesondere auch in der Krebstherapie bzw. bei Patienten mit chronischen Erkrankungen Anwendung [21]. Die Aussagekraft des Indikators wird dabei in verschiedenen Studien bestätigt, in denen Patienten mit chronischen Erkrankungen ihre Lebensqualität signifikant schlechter einschätzten [22–24]. In der Versorgung von Tumorpatienten ist die gesundheitsbezogene Lebensqualität von hoher Relevanz, einerseits, da sich die Überlebensraten und -zeiten vieler Krebserkrankungen aufgrund der Weiterentwicklungen in der Medizin, speziell auch im Zusammenwirken mit der Molekularbiologie und Genetik, vergrößert haben. Zurecht wird

bspw. im Kontext des Gemeinsamen Bundesausschusses (G-BA) die Wirksamkeit einer therapeutischen Intervention nicht mehr nur nach der Überlebenszeit beurteilt, vielmehr sollen explizit auch patientenrelevante Endpunkte mit einfließen, die beschreiben, „wie ein Patient fühlt, seine Funktionen und Aktivitäten wahrnehmen kann oder überlebt“ [25,26]. Seit vielen Jahren wird die gesundheitsbezogene Lebensqualität auch bei Brustkrebspatientinnen erhoben [27,28], von besonderer Bedeutung ist sie jedoch in der metastasierten Situation, da das primäre Therapieziel hier darin begründet liegt, den Patientinnen die verbliebene Lebenszeit bei möglichst gutem Allgemeinbefinden ermöglichen zu können [12–14]. Auch in der adjuvanten Therapie kann es zu einer deutlichen Verschlechterung der Lebensqualität kommen [29]. In verschiedenen Studien wurde zumeist mittels des Erhebungsbogens EORTC QLQ-C30 die Lebensqualität von Brustkrebspatientinnen erfasst, um die patientenbezogene Wirksamkeit (Effectiveness) verschiedener (chemo-)therapeutischer Interventionen festzuhalten bzw. zu vergleichen [30–32]. Bisher wurde jedoch nur unzureichend berücksichtigt, wie sich die Lebensqualität und der Gesundheitsstatus von Patientinnen in der metastasierten oder adjuvanten Situation im Vergleich zur altersadjustierten Allgemeinbevölkerung gestaltet, was jedoch nötig ist, um grundlegende Aussagen zum Grad der Beschwerdefreiheit treffen zu können. Auch fehlt bisher ein systematischer Vergleich verschiedener Erhebungsinstrumente, woraus sich ein möglicher Bias für die Validität der Befragungen ergibt. Die vorliegende Studie zielt daher darauf ab, die Lebensqualität mittels verschiedener etablierter Fragebögen zu erheben, die Resultate miteinander zu vergleichen und in Relation zur Lebensqualität der Allgemeinbevölkerung zu analysieren.

## Patienten/Material und Methoden

### Zielsetzung und Fragestellung

Im Rahmen einer Querschnittsuntersuchung am Department für Frauengesundheit des Universitätsklinikums Tübingen sollte untersucht werden, wie sich die gesundheitsbezogene Lebensqualität von Brustkrebspatientinnen in der metastasierten und adjuvanten Situation in Abhängigkeit von den verwendeten Fragebögen gestaltet. Eingeschlossen wurden alle weiblichen Brustkrebspatientinnen in der metastasierten oder adjuvanten Situation, die älter als 18 Jahre alt waren, chemo- und/oder zielgerichtet versorgt wurden, über ausreichend Deutschkenntnisse verfügten und nach Ansicht der Ärzte physisch und psychisch in der Lage waren, die Fragen zu beantworten. Die Erhebungen fanden während eines ambulanten Klinikaufenthalts unter Aufsicht eines behandelnden Arztes statt, die Patientinnen wurden gebeten, die Fragebögen während der therapeutischen Intervention (Chemotherapie und/oder zielgerichtete Therapie) auszufüllen. Die mittlere Behandlungszeit betrug 2 Stunden, die Patientinnen erhielten die Fragebögen zu Beginn der Therapieeinheit ausgehändigt. Vorab wurden die Patientinnen über die Fragebögen aufgeklärt und um ihr schriftliches Einverständnis gebeten. Ein positives Votum der Ethikkommission lag bei Untersuchungsbeginn vor (Nr. 234/2014BO1, Ethikkommission Tübingen). Durch Befragung des behandelnden Arztes wurden bei den Patientinnen in der metastasierten Situation ferner Unterschiede in der Metastasierungslokalisation (ossär, pulmonal, hepatisch, zerebral) erhoben, Unterschiede im Tumorstadium, Metastasierungsgrad und Therapiezeitpunkt (genaue Art der Chemo- und/oder zielgerichteten Therapie) aus Datenschutzgründen jedoch nicht, um die Anonymisie-

Supplementary Material – deutschsprachige Zusatzinformation! Zitierbar ist ausschließlich der englischsprachige Artikel.

Supplementary Material – deutschsprachige Zusatzinformation! Zitierbar ist ausschließlich der englischsprachige Artikel.

Supplementary Material – deutschsprachige Zusatzinformation! Zitierbar ist ausschließlich der englischsprachige Artikel.

Supplementary Material – deutschsprachige Zusatzinformation! Zitierbar ist ausschließlich der englischsprachige Artikel.

Supplementary Material – deutschsprachige Zusatzinformation! Zitierbar ist ausschließlich der englischsprachige Artikel.

9 Symptomskalen zusammen, um die Lebensqualität der Patientinnen anhand von 28 Fragen mehrdimensional auf einer 4-stufigen Skala zu erfassen. Zwei weitere Fragen dienen zur Feststellung des Gesundheitsstatus auf einer 7-stufigen Likert-Skala [33]. Mittels des Zusatzmoduls QLQ-BR 23 werden die Therapienebenwirkungen und tumorbedingten Symptome bei Brustkrebspatientinnen anhand von 23 Fragen verteilt auf 8 Skalen 4-stufig erfasst (beide Bögen: 1 = überhaupt nicht; 4 = sehr) [34]. Der generische EQ-5D-5L-Bogen überprüft die Lebensqualität in 5 Frage-dimensionen mittels einer 5-stufigen Skala sowie mittels der EQ-VAS-Skala, auf welcher der globale Gesundheitszustand als Zahl angekreuzt werden soll (0 = schlechteste vorstellbare Gesundheit, 100 = beste vorstellbare Gesundheit) [35]. Darüber hinaus wurden soziodemografische Daten (z.B. Alter, Bildungsstand) der Patientinnen erfragt.

### Methodik und statistische Analyse

Nach Dateneingabe wurde in MS Excel 2010 und IBM SPSS 21 zunächst eine Häufigkeitsanalyse durchgeführt, um deskriptive Besonderheiten der erhobenen Daten herauszuarbeiten. Die Mittelwertanalyse erfolgte dabei bei den EORTC-Bögen nach den Vorgaben, die für jede Skala die Berechnung eines Scores vorsehen, der Werte zwischen 0 und 100 annehmen kann [36]. Während in den 5 Funktionsskalen des QLQ-C30-Bogens ein möglichst hoher Wert ein hohes Maß an Funktionalität (und damit eine hohe Lebensqualität) repräsentiert, ist ein hoher Wert bei den Symptomskalen und den meisten BR23-Skalen negativ zu werten, da dann von einem hohen Beschwerdegrad ausgegangen werden muss. Auch die Auswertung des EQ-5D-5L- und EQ-VAS-Bogens erfolgte entsprechend der Vorgaben [37]. Nach Darstellung der gesundheitsbezogenen Lebensqualität des Kollektivs wurden die Items des EORTC-QLQ-C30-Bogens mit den Werten der weiblichen Allgemeinbevölkerung (n = 1309), sowie der 50–59-jährigen Alterskohorte derselben (n = 272) verglichen. Die Daten hierfür entstammten einer für die deutsche Erwachsenenbevölkerung repräsentativen Kohortenstudie [38]. Zur Identifizierung von Unterschieden zwischen dem untersuchten Kollektiv an Mammakarzinompatientinnen und der Vergleichsgruppe wurden unverbundene, 2-seitige t-Tests durchgeführt. Dabei wurde ein p-Wert von <0,05 2-seitig bei allen Analysen als statistisch signifikant gewertet ( $\alpha = 0,05$ ). Allen Berechnungen lag dabei die Annahme der Normalverteilung der Daten zugrunde (Shapiro-Wilk-Test). Auch zur Identifizierung etwaiger Unterschiede zwischen Patientinnen in metastasierter Situation und adjuvanter Therapie wurden unverbundene, 2-seitige t-Tests durchgeführt. Innerhalb des Subkollektivs der Patientinnen in der metastasierten Situation ließen sich zwischen den einzelnen Metastasierungslokalisationen aufgrund zu geringer Fallzahlen keine validen Testverfahren durchführen. Die Abbildungen wurden in Excel erstellt. Für den Boxplot wurde der globale Gesundheitsstatus des EORTC-QLQ-C30-Bogens mit den Ergebnissen des EQ-VAS-Bogens verglichen.

### Ergebnisse

Die Befragung fand von Juli bis November 2015 statt, die Teilnahmequote betrug 80%. N = 65 (68%) Patientinnen befanden sich in der metastasierten Situation, n = 31 (32%) erhielten eine adjuvante Therapie. Im Rahmen der statistischen Analyse wurden beide Patientinnengruppen zusammen analysiert, da zwischen beiden Gruppen keine signifikanten Unterschiede hinsichtlich

**Tab. 1** Soziodemografische Kennzeichen des Kollektivs.

| soziodemografisches Merkmal                      | Ausprägung in Stichprobe |
|--------------------------------------------------|--------------------------|
| <b>Alter</b>                                     |                          |
| ▶ Mittelwert (Median [25%-Quantil, 75%-Quantil]) | 56,68 (54 [50; 66])      |
| ▶ Standardabweichung (Spannweite (Min; Max))     | 12,38 (65 [20; 85])      |
| <b>Familienstand</b>                             |                          |
| ▶ verheiratet                                    | n = 76 (79%)             |
| ▶ verheiratet und getrennt lebend                | n = 2 (2%)               |
| ▶ ledig                                          | n = 3 (3%)               |
| ▶ geschieden                                     | n = 4 (4%)               |
| ▶ verwitwet                                      | n = 4 (4%)               |
| ▶ keine Angabe (valid term)                      | n = 6 (6%)               |
| <b>Kinder</b>                                    |                          |
| ▶ ja                                             | n = 69 (72%)             |
| ▶ nein                                           | n = 17 (18%)             |
| ▶ keine Angabe                                   | n = 10 (10%)             |
| <b>höchster Bildungsstand</b>                    |                          |
| ▶ Schule beendet ohne Abschluss (= 1)            | n = 1 (1%)               |
| ▶ Volks- oder Hauptschulabschluss (= 2)          | n = 31 (32%)             |
| ▶ mittlere Reife (= 3)                           | n = 28 ((29%)            |
| ▶ Fachhochschulreife (= 4)                       | n = 15 (16%)             |
| ▶ Abitur (= 5)                                   | n = 13 (14%)             |
| ▶ keine Angabe                                   | n = 8 (8%)               |
| <b>aktuell erwerbstätig</b>                      |                          |
| ▶ ja, Vollzeit                                   | n = 11 (12%)             |
| ▶ ja, Teilzeit                                   | n = 31 (32%)             |
| ▶ nein                                           | n = 43 (45%)             |
| ▶ keine Angabe                                   | n = 11 (11%)             |
| <b>Krankheits-/Therapiestatus</b>                |                          |
| metastasiert                                     | n = 65 (68%)             |
| Metastasierungslokalisation                      |                          |
| ▶ ossär                                          | n = 49 (75%)             |
| ▶ pulmonal                                       | n = 26 (40%)             |
| ▶ hepatisch                                      | n = 17 (26%)             |
| ▶ zerebral                                       | n = 3 (5%)               |
| > 1 Metastasierungslokalisation                  | n = 28 (43%)             |
| adjuvant                                         | n = 31 (32%)             |

der gesundheitsbezogenen Lebensqualität bestanden (vgl. **Tab. 2**). Insgesamt wurden n = 96 Patientinnen (Durchschnittsalter: 57 Jahre) mit entsprechender Diagnose an der Universitätsfrauenklinik in Tübingen papierbasiert befragt. Da sich der Fragebogen aus mehreren Teilfragebögen zusammensetzte, wurden die weiter hinten angeordneten Fragebögen nicht von allen Patientinnen beantwortet, beim EORTC QLQ-C30 konnten daher nur n = 74 Bögen in die statistische Analyse miteinbezogen werden.

### Soziodemografische Kennzeichen

**Tab. 1** zeigt die soziodemografischen Kennzeichen des Kollektivs. Das Durchschnittsalter der Patientinnen lag bei 56,68 Jahren (Altersspanne: 20–85). 38% der Patientinnen konnten der Alterskohorte der 50- bis 59-jährigen zugeordnet werden, die 25%- und 75%-Altersquantile betrugen 50 bzw. 66 Jahre (Median: 54). 79% der Patientinnen gaben an, verheiratet zu sein, zwei Drittel der Patientinnen hatten Kinder. Insgesamt 30% verfügten über einen höheren Bildungsgrad (Fachhochschulreife oder Abitur), etwas weniger als die Hälfte war trotz Erkrankung erwerbstätig (zumeist in Teilzeit). Etwa zwei Drittel der Patientinnen befanden sich in der metastasierten Situation. Bei diesen zeigten sich ossä-

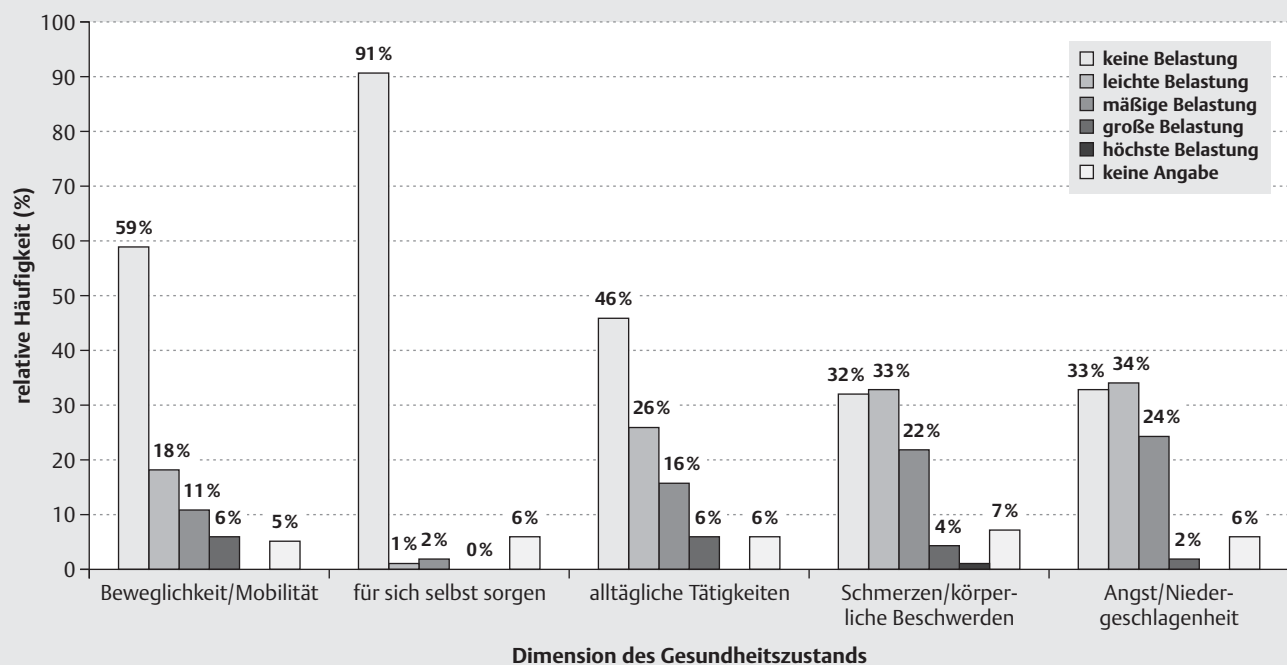

Abb. 2 Häufigkeitsverteilung des 5-dimensionalen EQ-5D-5L-Bogens.

re und pulmonale Metastasen dominierend, bei etwas weniger als der Hälfte der betroffenen Patientinnen fanden sich mehrere Metastasierungslokalisationen.

### Gesundheitsbezogene Lebensqualität und Gesundheitsstatus des Tübinger Kollektivs

Abb. 2 zeigt die Ergebnisse des EQ-5D-5L-Bogens. Ersichtlich ist, dass ein mittelmäßiges Belastungsniveau vor allem in den Dimensionen „Verrichtung alltäglicher Tätigkeiten“, „Schmerzen/körperliche Beschwerden“ und „Angst/Niedergeschlagenheit“ bestand, während bei den Aspekten „Beweglichkeit/Mobilität“ und „für sich selbst sorgen“ nur geringe Einschränkungen rückgemeldet wurden. 42% der befragten Patientinnen fühlten sich krankheitsbedingt leicht bis mäßig bei ihren alltäglichen Tätigkeiten eingeschränkt, 55% gaben an, an leichten bis mäßigen Schmerzen zu leiden, während große Schmerzen nur von 4% berichtet wurden. 58% merkten in der Dimension „Angst/Niedergeschlagenheit“ an, sich leicht bis mäßig belastet zu fühlen. Während bei der Verrichtung alltäglicher Tätigkeiten (46%), den Schmerzen (32%) und der Niedergeschlagenheit (33%) jeweils weniger als die Hälfte der Patientinnen angab, keine Belastung zu verspüren, waren es in den Dimensionen Beweglichkeit/Mobilität 59% und Selbstsorge sogar 91%. Die krankheits- bzw. therapieinduzierte Belastung zeigt sich in den 5 Bereichen also in unterschiedlicher Intensität.

In Tab. 2 sind die Befragungsergebnisse des EORTC-QLQ-C30-Bogens sowie des Brustmoduls BR23 dargestellt. Von den 5 Funktionsskalen des QLQ-C30 zeigen sich die größten Einschränkungen bei der arbeits- und freizeitbezogenen Belastbarkeit, der mittlere Scorewert betrug hier lediglich 59,4, gefolgt von der sozialen (61,4), emotionalen (63,6), körperlichen (72,9) und kognitiven Belastbarkeit (75,4). Bei den QLQ-C30-Symptomskalen zeigten sich die Belastungswerte deutlich erhöht vor allem bei den Symptomen Müdigkeit (44,4), Schlafstörungen (39,8),

Schmerz (32,3) und Atemnot (27,7) und erhöht bei den Variablen Durchfall (20,6) und Appetitlosigkeit (18,7). Relativ unauffällig zeigte sich nur die Symptomatik Übelkeit/Erbrechen (7). Für die Beschreibung des globalen Gesundheitsstatus konnte beim EORTC-Bogen ein mittlerer Wert von 58,2 ermittelt werden, wobei 100 die bestmögliche Gesundheit repräsentiert hätte. Bei den Ergebnissen aus der Auswertung des Brustmoduls fällt vor allem der Scorewert von 69,4 für das Körper selbstbild ungünstig aus. Auch der Grad der Besorgnis über den zukünftigen Gesundheitszustand wird mit einem Wert von 44,9 hoch bemessen. Bei den BR23-Symptomskalen wurden hohe Belastungswerte vor allem bei den Therapie Nebenwirkungen und dem Verlust der Haare rückgemeldet.

Festgestellt werden konnte, dass die verschiedenen Aspekte von Lebensqualität in Abhängigkeit der Skalierung der Fragebögen unterschiedlich abgebildet wurden (Abb. 3). Zwischen dem EQ-VAS-Bogen (MW: 64,7; Median: 70,0) und dem EORTC QLQ-C30 (MW: 58,2; Median: 58,3) waren die Unterschiede beim aktuellen Gesundheitsstatus statistisch signifikant ( $p = 0,0323$ ).

### Gesundheitsbezogene Lebensqualität des Kollektivs im Vergleich zur Durchschnittsbevölkerung

Das Ausmaß der Beschwerden und der Einschränkungen in der gesundheitsbezogenen Lebensqualität zeigt sich anhand des EORTC-Bogens beim Vergleich des einbezogenen Kollektivs von Mammakarzinompatientinnen mit den Ergebnissen der weiblichen Durchschnittsbevölkerung, sowie von 50–59-jährigen Frauen, die aufgrund des mittleren Alters der befragten Frauen (56,7 Jahre) als 2. Referenzkollektiv hinzugezogen wurden [38]. Im Vergleich zur weiblichen Durchschnittsbevölkerung werden die 5 Funktionsskalen der Brustkrebspatientinnen im Mittel um den Wert 23,7 schlechter bewertet (bei der Referenzgruppe der 50–59-jährigen Frauen: 24,5). Am deutlichsten zeigen sich die krankheitsbezogenen Einschränkungen bei der sozialen Belastbarkeit

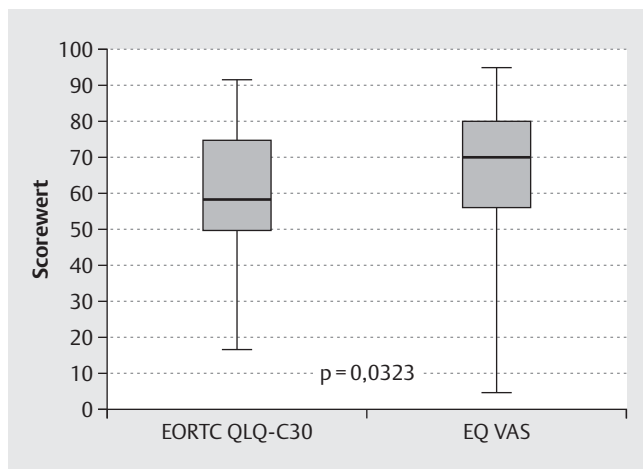

**Abb. 3** Boxplot Lebensqualität der EQ-VAS- und EORTC-QLQ-C30-Bögen im Vergleich.

(–31,9 bzw. –32,2) sowie bei der arbeits- und freizeitbezogenen Belastbarkeit (–30,5 bzw. –32,5). Sowohl die Unterschiede zwischen dem Kollektiv und der weiblichen Durchschnittsbevölkerung als auch zwischen den Patientinnen und dem weiblichen Referenzkollektiv gleichen Alters waren jeweils statistisch hoch

signifikant (● **Tab. 3**). Auch bezogen auf die Symptomskalen war die Lebensqualität der Patientinnen in allen Dimensionen hochsignifikant schlechter. Im Mittel zeigte sich hier eine um den Wert 17,1 erhöhte Belastung (bzw. 17,5 im Vergleich mit der 50–59-jährigen Referenzgruppe). Am stärksten zeigten sich die Unterschiede bei den Symptomen Müdigkeit (+28 bzw. +28,8), Schlafstörungen (+26,8 bzw. +24) und Atemnot (+20,5 bzw. +21,3). Der Wert für den globalen Gesundheitsstatus fiel bei Patientinnen des untersuchten Kollektivs im Mittel um 16,3 Prozentpunkte ungünstiger aus als in der weiblichen Allgemeinbevölkerung bzw. 16,2 Prozentpunkte schlechter als in der gleichaltrigen Referenzgruppe.

## Diskussion

Im Rahmen dieser Untersuchung konnte die gesundheitsbezogene Lebensqualität von Brustkrebspatientinnen in metastasierter oder adjuvanter Situation zum Zeitpunkt einer ambulant-therapeutischen Intervention festgestellt werden. Der Gesundheitsstatus erwies sich dabei als signifikant schlechter als in der Allgemeinbevölkerung. Bedeutsam ist, dass fragebogenabhängige Unterschiede identifiziert werden konnten. Obwohl alle Bögen von allen Patientinnen zum gleichen Zeitpunkt ausgefüllt wurden, die Patientinnen ihre Lebensqualität also fragebogenübergreifend gleich wahrnahmen, zeigten sich deutliche Unterschiede

**Tab. 2** Ergebnisse EORTC QLQ-C30 und EORTC QLQ-BR23.

| Skala                                                  | Anzahl der Fragen<br>(Frage-Items)<br>EORTC QLQ-C30, V. 3 | Score gepoolt:<br>MW (SD)<br>n = 74 | Score metastasiert: MW (SD)<br>n = 42 | Score adjuvant:<br>MW (SD)<br>n = 32 | p-Wert (α=0,05)<br>Score metastasiert<br>vs. adjuvant |
|--------------------------------------------------------|-----------------------------------------------------------|-------------------------------------|---------------------------------------|--------------------------------------|-------------------------------------------------------|
| Funktionsskalen                                        |                                                           |                                     |                                       |                                      |                                                       |
| ► körperliche Belastbarkeit*                           | 5 (1–5)                                                   | 72,9 (22,1)                         | 71,3 (23,1)                           | 74,8 (21,0)                          | 0,504                                                 |
| ► Belastbarkeit Arbeit und Freizeit*                   | 2 (6–7)                                                   | 59,4 (32,5)                         | 62,6 (33,2)                           | 55,6 (31,7)                          | 0,363                                                 |
| ► emotionale Belastbarkeit*                            | 4 (21–24)                                                 | 63,6 (24,7)                         | 65,5 (25,2)                           | 61,4 (24,4)                          | 0,707                                                 |
| ► kognitive Belastbarkeit*                             | 2 (20, 25)                                                | 75,4 (26,2)                         | 71,7 (36,7)                           | 78,4 (25,7)                          | 0,381                                                 |
| ► soziale Belastbarkeit*                               | 2 (26, 27)                                                | 61,4 (32,4)                         | 60,4 (30,5)                           | 62,6 (35,0)                          | 0,774                                                 |
| Symptomskalen                                          |                                                           |                                     |                                       |                                      |                                                       |
| ► Müdigkeit                                            | 3 (10, 12, 18)                                            | 44,4 (26,3)                         | 42,4 (29,5)                           | 47,0 (21,6)                          | 0,460                                                 |
| ► Übelkeit/Erbrechen                                   | 2 (14, 15)                                                | 7,0 (13,3)                          | 8,3 (15,6)                            | 5,9 (11,3)                           | 0,465                                                 |
| ► Schmerz                                              | 2 (9, 19)                                                 | 32,3 (32,4)                         | 34,4 (31,5)                           | 30,6 (33,4)                          | 0,618                                                 |
| ► Atemnot                                              | 1 (8)                                                     | 27,7 (28,6)                         | 23,0 (27,0)                           | 33,3 (29,8)                          | 0,124                                                 |
| ► Schlafstörungen                                      | 1 (11)                                                    | 39,8 (33,0)                         | 42,6 (36,2)                           | 36,6 (29,0)                          | 0,445                                                 |
| ► Appetitlosigkeit                                     | 1 (13)                                                    | 18,7 (26,4)                         | 15,7 (23,2)                           | 22,0 (29,6)                          | 0,308                                                 |
| ► Verstopfung                                          | 1 (16)                                                    | 10,8 (24,7)                         | 11,7 (27,5)                           | 9,7 (21,4)                           | 0,735                                                 |
| ► Durchfall                                            | 1 (17)                                                    | 20,6 (33,6)                         | 15,3 (25,6)                           | 26,9 (40,8)                          | 0,139                                                 |
| ► finanzielle Auswirkungen                             | 1 (28)                                                    | 23,5 (31,9)                         | 19,8 (29,9)                           | 28,2 (34,2)                          | 0,269                                                 |
| ► globaler Gesundheitsstatus*                          | 2 (29, 30)                                                | 58,2 (21,0)                         | 57,4 (22,0)                           | 59,0 (20,0)                          | 0,748                                                 |
| Skala                                                  | Anzahl der Fragen<br>(Frage-Items),<br>Brustmodul BR23    | Score: MW (SD)                      |                                       |                                      |                                                       |
| Funktionsskalen                                        |                                                           |                                     |                                       |                                      |                                                       |
| ► Körperseלבstbild                                     | 4 (9–12)                                                  | 69,4 (30,1)                         | 62,6 (34,1)                           | 69,7 (24,6)                          | 0,323                                                 |
| ► sexuelle Aktivität*                                  | 2 (14, 15)                                                | 76,6 (23,4)                         | 79,2 (23,2)                           | 73,5 (23,7)                          | 0,303                                                 |
| ► Spaß an sexueller Aktivität*                         | 1 (16)                                                    | 43,5 (25,5)                         | 36,7 (10,5)                           | 48,7 (32,2)                          | 0,026                                                 |
| ► Besorgnis über den zukünftigen<br>Gesundheitszustand | 1 (13)                                                    | 44,9 (31,2)                         | 46,8 (32,8)                           | 42,7 (29,6)                          | 0,580                                                 |
| Symptomskalen                                          |                                                           |                                     |                                       |                                      |                                                       |
| ► Therapie Nebenwirkungen                              | 7 (1–4, 6–8)                                              | 27,7 (18,6)                         | 29,6 (18,9)                           | 25,9 (18,8)                          | 0,406                                                 |
| ► Beschwerden in der Brust                             | 4 (20–23)                                                 | 15,3 (17,8)                         | 13,3 (19,0)                           | 17,7 (16,3)                          | 0,298                                                 |
| ► Beschwerden in Arm/Schulter                          | 3 (17–19)                                                 | 23,5 (23,7)                         | 22,8 (22,1)                           | 24,4 (25,9)                          | 0,775                                                 |
| ► Verstimtheit durch Haarausfall                       | 1 (5)                                                     | 35,4 (35,8)                         | 43,1 (40,4)                           | 26,7 (31,6)                          | 0,215                                                 |

\* Items sind positiv skaliert, hohe Werte stehen also für ein günstiges LQ-Profil.

**Tab. 3** Gesundheitsbezogene Lebensqualität (EORTC QLQ-C30) des Krebskollektivs im Vergleich zur weiblichen Durchschnittsbevölkerung Deutschlands, sowie zu den 50–59-jährigen Frauen (Referenzkollektiv) [38].

| Skala                               | 1. Krebskollektiv Tübingen (gepoolt): MW (SD), n = 74* | 2. Referenzkollektiv Frauen: MW (SD), n = 1 309 | Differenz 1. zu 2. | p-Wert ( $\alpha=0,05$ ) | 3. Referenzkollektiv Frauen 50–59 Jahre: MW (SD), n = 272 | Differenz 1. zu 3. | p-Wert ( $\alpha=0,05$ ) |
|-------------------------------------|--------------------------------------------------------|-------------------------------------------------|--------------------|--------------------------|-----------------------------------------------------------|--------------------|--------------------------|
| <b>Funktionsskalen</b>              |                                                        |                                                 |                    |                          |                                                           |                    |                          |
| ► körperliche Belastbarkeit         | 72,9 (22,1)                                            | 91,5 (15,5)                                     | – 18,6             | <0,0001                  | 92,9 (13,7)                                               | – 20               | <0,0001                  |
| ► Belastbarkeit Arbeit und Freizeit | 59,4 (32,5)                                            | 89,9 (20,6)                                     | – 30,5             | <0,0001                  | 91,9 (18,5)                                               | – 32,5             | <0,0001                  |
| ► emotionale Belastbarkeit          | 63,6 (24,7)                                            | 83,2 (19,3)                                     | – 19,6             | <0,0001                  | 82,2 (20,6)                                               | – 18,6             | <0,0001                  |
| ► kognitive Belastbarkeit           | 75,4 (26,2)                                            | 93,4 (14,6)                                     | – 18               | <0,0001                  | 94,5 (13,4)                                               | – 19,1             | <0,0001                  |
| ► soziale Belastbarkeit             | 61,4 (32,4)                                            | 93,3 (17,1)                                     | – 31,9             | <0,0001                  | 93,6 (17,0)                                               | – 32,2             | <0,0001                  |
| <b>Symptomskalen</b>                |                                                        |                                                 |                    |                          |                                                           |                    |                          |
| ► Müdigkeit                         | 44,4 (26,3)                                            | 16,4 (21,4)                                     | 28                 | <0,0001                  | 15,6 (21,1)                                               | 28,8               | <0,0001                  |
| ► Übelkeit/Erbrechen                | 7,0 (13,3)                                             | 2,4 (9,6)                                       | 4,6                | <0,0001                  | 1,6 (7,9)                                                 | 5,4                | <0,0001                  |
| ► Schmerz                           | 32,3 (32,4)                                            | 17,0 (24,2)                                     | 15,3               | <0,0001                  | 16,0 (24,7)                                               | 16,3               | <0,0001                  |
| ► Atemnot                           | 27,7 (28,6)                                            | 7,2 (18,7)                                      | 20,5               | <0,0001                  | 6,4 (17,9)                                                | 21,3               | <0,0001                  |
| ► Schlafstörungen                   | 39,8 (33,0)                                            | 13,0 (23,6)                                     | 26,8               | <0,0001                  | 15,8 (26,4)                                               | 24                 | <0,0001                  |
| ► Appetitlosigkeit                  | 18,7 (26,4)                                            | 4,2 (13,9)                                      | 14,5               | <0,0001                  | 3,2 (12,1)                                                | 15,5               | <0,0001                  |
| ► Verstopfung                       | 10,8 (24,7)                                            | 3,1 (12,1)                                      | 7,7                | <0,0001                  | 2,9 (12,5)                                                | 7,9                | 0,0002                   |
| ► Durchfall                         | 20,6 (33,6)                                            | 2,9 (12,7)                                      | 17,7               | <0,0001                  | 1,5 (8,5)                                                 | 19,1               | <0,0001                  |
| ► finanzielle Auswirkungen          | 23,5 (31,9)                                            | 4,8 (16,3)                                      | 18,7               | <0,0001                  | 4,5 (17,9)                                                | 19                 | <0,0001                  |
| globaler Gesundheitsstatus          | 58,2 (21,0)                                            | 74,5 (19,4)                                     | – 16,3             | <0,0001                  | 74,4 (17,9)                                               | – 16,2             | <0,0001                  |

\* für n = 74 Patientinnen des Gesamtkollektivs (n = 96) lagen verwertbare Daten für den EORTC-Bogen vor.

de in der Abbildung des Belastungsniveaus in Abhängigkeit zum verwendeten Tool. Lebensqualität und Belastungsniveau werden je nach verwendetem Tool in unterschiedlichem Intensitätsgrad und Symptombereich abgebildet, weswegen die Ergebnisse entsprechender Befragungen viel stärker reflektiert werden müssen. Wenngleich bekannt ist, dass die unterschiedlichen Erhebungsinstrumente die Parameter (Schmerz, Physis, Psyche, vegetative Funktionen u. a.) unterschiedlich gewichten, wurde bisher zu wenig berücksichtigt, dass daraus eine unterschiedliche Wahrnehmung des Gesundheitsstatus resultiert. Da durch Überprüfung der Lebensqualität und anderer patientenrelevanter Endpunkte die Wirksamkeit einer therapeutischen Intervention beurteilt werden soll, ergibt sich eine klinische Relevanz. Beim EQ-5D-5L konnten als Hauptbelastungen Schmerzen sowie Ängste resp. Niedergeschlagenheit identifiziert werden. Beim EORTC-Brustmodul QLQ-BR23 ließ sich ein relativ hohes Belastungsniveau durch Therapieebenenwirkungen und speziell den Verlust der Haare nachweisen. Grundsätzlich erwies sich der EORTC-QLQ-C30-Bogen im vorliegenden Kollektiv als das am ehesten geeignete Instrument, um die selbstberichtete Lebensqualität der Patientinnen differenziert abzubilden, grundsätzlich sollte die Wahl des Fragebogens jedoch von der zu untersuchenden Fragestellung abhängig gemacht werden. Wie die Auswertung des mehrdimensionalen EORTC-QLQ-C30-Bogens ergab, erwies sich die Lebensqualität der Patientinnen in allen Bereichen als optimierungsbedürftig und signifikant schlechter als in der Referenzbevölkerung. Vor dem Hintergrund des Therapieziels bei Patientinnen in der metastasierten Situation (Verlängerung der Überlebenszeit bei möglichst hoher Lebensqualität) [12–14] ist vor allem die Größe des Unterschieds in der Wahrnehmung der Lebensqualität zwischen dem Patientinnen und dem Referenzkollektiv von Relevanz: Deutliche Defizite zeigten sich (auf Ebene der Funktionsskalen) vor allem in den Bereichen der sozialen sowie arbeits- und freizeitbezogenen Belastbarkeit, während sich auf Symptomebene Müdigkeit, Schlafstörungen und Atemnot be-

sonders stark ausgeprägt darstellten. Der globale Gesundheitsstatus wurde im Mittel um 16,3 Skaleneinheiten schlechter bewertet als in der Durchschnittsbevölkerung bzw. 10,8 Prozentpunkte schlechter als in der gleichaltrigen Referenzgruppe. Obwohl die Fallzahl des Kollektiv gering war, entsprechen die Rückmeldungen der Patientinnen beim EORTC-Bogen sowohl bei den Funktionsskalen als auch bei den Symptomdimensionen im Wesentlichen der Ergebnissen anderer Studien [29,30], bei denen die Lebensqualität zur Verdeutlichung des Belastungsniveaus allerdings nicht mit einer Referenzpopulation verglichen wurde. Damit unterstreicht die vorliegende Untersuchung die Notwendigkeit der Messung von patientenrelevanten Endpunkten mit unterschiedlichen Instrumenten, um die Lebensqualität realitätsnah einschätzen und in der metastasierten Situation weiter verbessern zu können. Auch für Patientinnen in der adjuvanten Therapie mit ähnlich niedriger Lebensqualität empfiehlt sich ein kontinuierliches Monitoring. Adjuvante chemotherapeutische Interventionen kommen zumeist bei Patientinnen zum Einsatz, bei denen eine Metastasierung nach operativer Entfernung des Primärtumors nicht nachgewiesen, aber auch nicht ausgeschlossen werden kann [39,40]. Gleichzeitig unterstreicht die Studie die Notwendigkeit, subjektiv empfundene Gesundheitsmerkmale möglichst mehrdimensional zu erheben, da der selbst wahrgenommene Gesundheitsstatus in Abhängigkeit vom jeweiligen Erhebungsinstrument unterschiedlich abgebildet wird, weswegen nach Maßgabe des G-BA zur Lebensqualitätsmessung im Rahmen von PRO-Erhebung jeweils ein generischer und ein spezifischer Fragebogen zum Einsatz kommen sollen. Zu den Stärken der vorliegenden Studie gehört, dass signifikante Unterschiede in der Abbildung der Lebensqualität in Abhängigkeit vom verwendeten Erhebungsinstrument identifiziert werden konnten. Limitierend wirkte die geringe Fallzahl, da sich keine signifikanten Unterschiede in der dargestellten Lebensqualität zwischen metastasierter Situation und adjuvanter Therapie zeigten. Grundsätzlich ist bei Patientinnen in der metastasierten Situation eine

geringere selbst berichtete Lebensqualität als in der adjuvanten Therapie zu erwarten [32,40]. Anzustreben sind daher Untersuchungen, die eine direkte Vergleichbarkeit zwischen beiden Patientinnengruppen erlauben. Zur Verbesserung der Validität von Befragungen zur gesundheitsbezogenen Lebensqualität empfiehlt es sich ferner, analoge Studien mit größerem Patientinnenkollektiv durchzuführen, um zu analysieren, ob die hier dargestellten fragebogeninduzierten Unterschiede in der Abbildung der Lebensqualität abhängig vom Erkrankungsstatus sind. Insbesondere sollten multizentrisch organisierte Studien mit Patientinnen in der metastasierten Situation angestrebt werden, um festhalten zu können, inwiefern sich Metastasierungsgrad, Lokalisation und Therapiezeitpunkt auf die selbst berichtete Lebensqualität auswirken. Da in vorliegendem Kollektiv alle Patientinnen *therapiebegleitend* während einer Intervention befragt wurden, kam dem Zeitpunkt der Befragung vermutlich keine limitierende Wirkung zu. Allerdings wurden aufgrund des Fragebogensumfangs und der Tatsache, dass es den Patientinnen untersagt war, die Fragebögen mit nach Hause zu nehmen und dort fertig auszufüllen, nicht alle Teilbögen von allen Patientinnen beantwortet. Möglicherweise wirkten jedoch Therapieart und -zeitpunkt als Bias, da weder berücksichtigt werden konnte, ob die Patientinnen zum Befragungszeitpunkt ausschließlich chemotherapeutisch befragt wurden, eine Kombination aus Chemo- und zielgerichteter Therapie stattfand oder ausschließlich zielgerichtete Verfahren angewandt wurden. Hier sollten ebenfalls größer angelegte Studien durchgeführt werden, um Subgruppen in statistisch verwertbarer Größe generieren zu können.

## Schlussfolgerungen

Die gesundheitliche Lebensqualität von Mammakarzinompatientinnen in der metastasierten oder adjuvanten Situation gestaltet sich trotz Fortschritten in der Therapie im Vergleich zur Durchschnittsbevölkerung nach wie vor als optimierungsbedürftig. Die Studie unterstreicht die Notwendigkeit einer beständigen Lebensqualitätsmessung (Monitoring) bei palliativ versorgten Patientinnen, um das Therapieziel, den Patientinnen eine möglichst lange Überlebenszeit bei weitestgehender Beschwerdefreiheit zu ermöglichen, umsetzen zu können. Darüber hinaus ist die Wahl des Fragebogens mitentscheidend für die dargestellte Lebensqualität.

## Einhaltung ethischer Richtlinien

Alle beschriebenen Untersuchungen am Menschen wurden mit Zustimmung der zuständigen Ethikkommission, im Einklang mit nationalem Recht sowie gemäß der Deklaration von Helsinki von 1975 (in der aktuellen, überarbeiteten Fassung) durchgeführt. Von allen beteiligten Patienten liegt eine Einverständniserklärung vor.

## Interessenkonflikt

Die Autoren geben an, dass kein Interessenkonflikt besteht.

## Institute

- <sup>1</sup> Abteilung für Allgemeine Frauenheilkunde und Geburtshilfe, Universitätsklinikum Heidelberg, Heidelberg
- <sup>2</sup> Department für Frauengesundheit, Universitätsklinikum Tübingen, Tübingen
- <sup>3</sup> Forschungsinstitut für Frauengesundheit, Universitätsklinikum Tübingen, Tübingen
- <sup>4</sup> Stabsstelle Sozialmedizin, Universitätsklinikum Tübingen, Tübingen
- <sup>5</sup> Frauenklinik, Universitätsklinikum Erlangen, Erlangen
- <sup>6</sup> Studiendekanat, Medizinische Fakultät, Universität Tübingen, Tübingen

## Literatur

- 1 *Rhiem K, Schmutzler RK.* Risikofaktoren und Prävention des Mammakarzinoms. *Onkologe* 2015; 21: 202–210
- 2 *RKI (Robert Koch-Institut).* Krebs in Deutschland 2009/2010. Berlin 2015. Online: [http://www.krebsdaten.de/Krebs/DE/Content/Publikationen/Krebs\\_in\\_Deutschland/kid\\_2015/krebs\\_in\\_deutschland\\_2015.pdf?\\_\\_blob=publicationFile](http://www.krebsdaten.de/Krebs/DE/Content/Publikationen/Krebs_in_Deutschland/kid_2015/krebs_in_deutschland_2015.pdf?__blob=publicationFile); Stand: 01.04.2016
- 3 *RKI (Robert Koch-Institut); Zentrum für Krebsregisterdaten.* Brustkrebs (Mammakarzinom). Online: [http://www.krebsdaten.de/Krebs/DE/Content/Krebsarten/Brustkrebs/brustkrebs\\_node.html](http://www.krebsdaten.de/Krebs/DE/Content/Krebsarten/Brustkrebs/brustkrebs_node.html); Stand: 10.03.2016
- 4 *Gondos A, Bray F, Hakulinen T et al.* Trends in cancer survival in 11 European populations from 1990 to 2009: a model-based analysis. *Ann Oncol* 2009; 20: 564–573
- 5 *Kunze U.* Mammakarzinom: Epidemiologie und Risikofaktoren. *J Gastroenterol Hepatol Erkr* 2011; 9: 38–40
- 6 *Cady B.* Local therapy and survival in breast cancer. *N Engl J Med* 2007; 357: 1051–1052; author reply 1052
- 7 *Heil J, Gondos A, Rauch G et al.* Outcome analysis of patients with primary breast cancer initially treated at a certified academic breast unit. *Breast* 2012; 21: 303–308
- 8 *Jemal A, Siegel R, Xu J et al.* Cancer statistics, 2010. *CA Cancer J Clin* 2010; 60: 277–300
- 9 *MacMahon B.* Epidemiology and the causes of breast cancer. *Int J Cancer* 2006; 118: 2373–2378
- 10 *De Grève J, Sermijn E, De Brakeleer S et al.* Hereditary breast cancer: from bench to bedside. *Curr Opin Oncol* 2008; 20: 605–613
- 11 *Hamilton R.* Genetics: breast cancer as an exemplar. *Nurs Clin North Am* 2009; 44: 327–338
- 12 *Schneeweiss A, Ruckhäberle E, Huober J.* Chemotherapie des metastasierten Mammakarzinoms – ein Anachronismus in der Ära der personalisierten, zielgerichteten onkologischen Therapie? *Geburtsh Frauenheilk* 2015; 75: 574–583
- 13 *Dufresne A, Pivrot X, Tournigand C et al.* Impact of chemotherapy beyond the first line in patients with metastatic breast cancer. *Breast Cancer Res Treat* 2008; 107: 275–279
- 14 *Cortés J, Baselga J, Im YH et al.* Health-related quality-of-life assessment in CLEOPATRA, a phase III study combining pertuzumab with trastuzumab and docetaxel in metastatic breast cancer. *Ann Oncol* 2013; 24: 2630–2635
- 15 *Martino M, Ballestrero A, Zambelli A et al.* Long-term survival in patients with metastatic breast cancer receiving intensified chemotherapy and stem cell rescue: data from the Italian registry. *Bone Marrow Transplant* 2015; 48: 414–418
- 16 *Jackisch C.* Metastasiertes Mammakarzinom: Längeres und besseres Überleben. *Dtsch Arztebl* 2014; 111: 18–23
- 17 *Cetin K, Christiansen CF, Sværke C et al.* Survival in patients with breast cancer with bone metastasis: a Danish population-based cohort study on the prognostic impact of initial stage of disease at breast cancer diagnosis and length of the bone metastasis-free interval. *BMJ Open* 2015; 5: e007702
- 18 *Ahn SG, Lee HM, Cho SH et al.* Prognostic factors for patients with bone-only metastasis in breast cancer. *Yonsei Med J* 2013; 54: 1168–1177
- 19 *RKI (Robert Koch-Institut).* Gesundheitsbezogene Lebensqualität. Online: [http://www.rki.de/DE/Content/Gesundheitsmonitoring/Gesundheitsberichterstattung/GesundAZ/Content/G/Gesbez\\_Lebensqualitaet/Gesbez\\_Lebensqualitaet.html](http://www.rki.de/DE/Content/Gesundheitsmonitoring/Gesundheitsberichterstattung/GesundAZ/Content/G/Gesbez_Lebensqualitaet/Gesbez_Lebensqualitaet.html); Stand: 10.01.2016
- 20 *Radoschewski M.* Gesundheitsbezogene Lebensqualität – Konzepte und Maße. *Bundesgesundheitsbl Gesundheitsforschung Gesundheitschutz* 2000; 43: 165–189
- 21 *Kemmler G, Holzner B, Kopp M et al.* Comparison of two quality-of-life instruments for cancer patients: the functional assessment of cancer therapy-general and the European Organization for Research and Treatment of Cancer Quality of Life Questionnaire-C30. *J Clin Oncol* 1999; 17: 2932–2940

- 22 Stephens C, Alpass F, Baars M et al. SF-36v2 norms for New Zealanders aged 55–69 years. *N Z Med J* 2010; 123: 1–11
- 23 Laguardia J, Campos MR, Travassos CM et al. Psychometric evaluation of the SF-36 (v.2) questionnaire in a probability sample of Brazilian households: results of the survey Pesquisa Dimensoes Sociais das Desigualdades (PDSD), Brazil, 2008. *Health Qual Life Outcomes* 2011; 9: 61
- 24 Ellert U, Kurth BM. Gesundheitsbezogene Lebensqualität bei Erwachsenen in Deutschland (DEGS1). Bundesgesundheitsbl Gesundheitsforschung Gesundheitsschutz 2013; 56: 643–649
- 25 IQWiG (Institut für Qualität und Wirtschaftlichkeit im Gesundheitswesen). Allgemeine Methoden, 2008, S.31. Online: [https://www.iqwig.de/download/IQWiG\\_Methoden\\_Version\\_3\\_0.pdf](https://www.iqwig.de/download/IQWiG_Methoden_Version_3_0.pdf); Stand: 09.01.2016
- 26 G-BA (Gemeinsamer Bundesausschuss). Verfahrensordnung des Gemeinsamen Bundesausschusses, Stand: 21.06.2012, S.30. Online: [https://www.g-ba.de/downloads/62-492-634/VerfO\\_2012-06-21.pdf](https://www.g-ba.de/downloads/62-492-634/VerfO_2012-06-21.pdf); Stand: 09.01.2016
- 27 Perry S, Kowalski TL, Chang CH. Quality of life assessment in women with breast cancer: benefits, acceptability and utilization. *Health Qual Life Outcomes* 2007; 5: 24
- 28 Koch L, Jansen L, Herrmann A et al. Quality of life in long-term breast cancer survivors – a 10-year longitudinal population-based study. *Acta Oncol* 2013; 52: 1119–1128
- 29 Alzabaidey FJ. Quality of life assessment for patients with breast cancer receiving adjuvant therapy. *J Cancer Sci Ther* 2012; 4: 051–055
- 30 Karamouzis MV, Ioannidis G, Rigatos G. Quality of life in metastatic breast cancer patients under chemotherapy or supportive care: a single-institution comparative study. *Eur J Cancer Care (Engl)* 2007; 16: 433–438
- 31 Kyrgidis A, Triaridis S, Kontos K et al. Quality of life in breast cancer patients with bisphosphonate-related osteonecrosis of the jaws and patients with head and neck cancer: a comparative study using the EORTC QLQ-C30 and QLQ-HN35 questionnaires. *Anticancer Res* 2012; 32: 3527–3534
- 32 Korpela J, Mali P, Kaljonen A et al. Quality of life of patients with metastatic breast cancer treated with epirubicin and docetaxel. *Int J Clin Med* 2011; 2: 346–351
- 33 Aaronson NK, Ahmedzai S, Bergman B et al. The European Organization for Research and Treatment of Cancer QLQ-C30: a quality-of-life instrument for use in international clinical trials in oncology. *J Natl Cancer I* 1993; 85: 365–376
- 34 Nguyen J, Popovic M, Chow E et al. EORTC QLQ-BR23 and FACT-B for the assessment of quality of life in patients with breast cancer: a literature review. *J Comp Eff Res* 2015; 4: 157–166
- 35 Greiner W, Claes C, Busschbach JJ et al. Validating the EQ-5D with time trade off for the German population. *Eur J Health Econ* 2005; 6: 124–130
- 36 EORTC data center. EORTC QLQ C-30 Scoring Manual. 3rd ed. Brussels: Eigenverlag; 2001. Online: [https://www.google.de/url?sa=t&rct=j&q=&esrc=s&source=web&cd=9&cad=rja&uact=8&ved=0ahUKewjKuuycgqfKAhVIJw4KHWL7D2EQFghhMAG&url=https%3A%2F%2Fwiki.nci.nih.gov%2Fdownload%2Fattachments%2F167543767%2FEORTC\\_QLQ\\_C30%2520\\_scoring\\_Manual.pdf%3Fversion%3D1%26modificationDate%3D1412301929000%26api%3Dv2&usq=AFQjCNH\\_ZiUk6ZwXzvdwpwzWEjUTRNhhjcQ&bvm=bv.111396085,bs.1,d.bGQ](https://www.google.de/url?sa=t&rct=j&q=&esrc=s&source=web&cd=9&cad=rja&uact=8&ved=0ahUKewjKuuycgqfKAhVIJw4KHWL7D2EQFghhMAG&url=https%3A%2F%2Fwiki.nci.nih.gov%2Fdownload%2Fattachments%2F167543767%2FEORTC_QLQ_C30%2520_scoring_Manual.pdf%3Fversion%3D1%26modificationDate%3D1412301929000%26api%3Dv2&usq=AFQjCNH_ZiUk6ZwXzvdwpwzWEjUTRNhhjcQ&bvm=bv.111396085,bs.1,d.bGQ); Stand: 10.01.2016
- 37 Van Reenen M, Janssen B. EQ-5D-5L User Guide. Basic information and how to use the EQ-5D-5L instrument. 2015. Online: [http://www.euroqol.org/fileadmin/user\\_upload/Documenten/PDF/Folders\\_Flyers/EQ-5D-5L\\_UserGuide\\_2015.pdf](http://www.euroqol.org/fileadmin/user_upload/Documenten/PDF/Folders_Flyers/EQ-5D-5L_UserGuide_2015.pdf); Stand: 12.01.2016
- 38 Hinz A, Singer S, Brahler E. European reference values for the quality of life questionnaire EORTC QLQ-C30: results of a German investigation and a summarizing analysis of six European general population normative studies. *Acta Oncol* 2014; 53: 958–965
- 39 NIH National Cancer Institute. Adjuvant and neoadjuvant therapy for breast cancer. 2009. Online: <http://www.cancer.gov/types/breast/adjuvant-fact-sheet>; Stand: 01.02.2016
- 40 Bernhard J, Luo W, Ribi K et al. Patient-reported outcomes with adjuvant exemestane versus tamoxifen in premenopausal women with early breast cancer undergoing ovarian suppression (TEXT and SOFT): a combined analysis of two phase 3 randomised trials. *Lancet Oncol* 2015; 16: 848–858
